# Supplementary material for: The antifungal plant defensin AtPDF2.3 from Arabidopsis thaliana blocks potassium channels
Source: PubMed Central journal article supplement (PMC5004176; doi:10.1038/srep32121), 2016-08-30
Supplement: srep32121-s1.pdf [file srep32121-s1.pdf]

## Supplementary information

### The antifungal plant defensin AtPDF2.3 from *Arabidopsis thaliana* blocks potassium channels

Kim Vriens<sup>1</sup>, Steve Peigneur<sup>2</sup>, Barbara De Coninck<sup>1,3</sup>, Jan Tytgat<sup>2</sup>, Bruno P.A. Cammue<sup>1,3,\*</sup>, Karin Thevissen<sup>1</sup>

<sup>1</sup>Centre of Microbial and Plant Genetics, KU Leuven, Kasteelpark Arenberg 20, 3001 Heverlee, Belgium

<sup>2</sup>Toxicology and Pharmacology, University of Leuven, O&N 2, Herestraat 49, P.O. Box 922, 3000, Leuven, Belgium

<sup>3</sup>VIB Department of Plant Systems Biology, Technologiepark 927, 9052 Ghent, Belgium

\*[bruno.cammue@biw.vib-kuleuven.be](mailto:bruno.cammue@biw.vib-kuleuven.be)

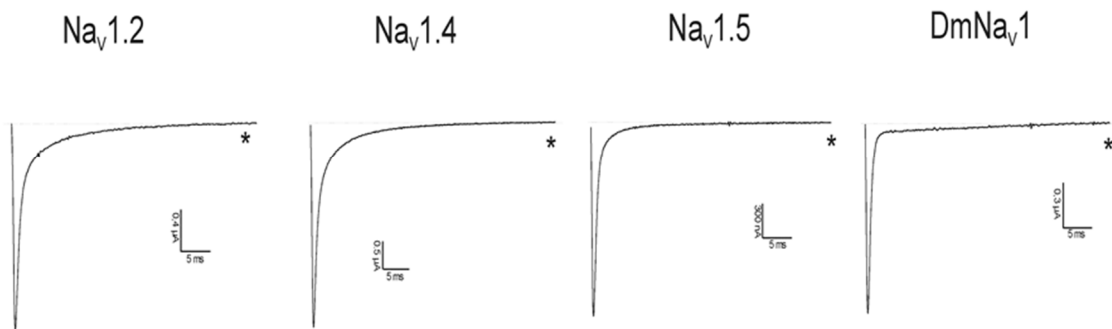

**Supplementary Figure S1 Activity of rAtPDF2.3 on ion channels expressed in *X. laevis* oocytes.** Traces shown are representative of at least three independent experiments ( $n \geq 3$ ). The dotted line indicates the zero current level. The asterisk (\*) distinguishes the steady-state current after application of 5  $\mu$ M defensin.

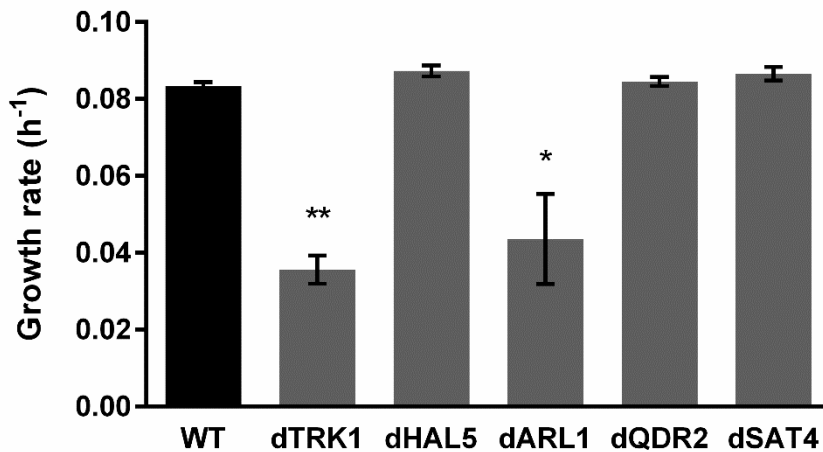

**Supplementary Figure S2 Growth rates of *S. cerevisiae* BY4741 WT and knockout strains used in this study.** Bioscreen assays were carried out to determine the growth rate of *S. cerevisiae* and the *S. cerevisiae* knockout strains that were found hypersensitive towards rAtPDF2.3 (Table 2). Growth rates were determined employing the equation  $Growth\ rate = (OD_{600nm;13\ hours} - OD_{600nm;10\ hours}) / (13\ hours - 10\ hours)$ , where growth was exponential, and hence in the linear range, for all strains tested. Data represent biological triplicates (n = 3) with three technical replicates each, and are presented as mean  $\pm$  standard error. ANOVA followed by Dunnett post hoc test was performed to analyse statistically significant differences between the growth rates of the BY4741 WT and the knockout strains, respectively. \* and \*\* represent  $P = 0.0015$  and  $P = 0.0003$ , respectively.

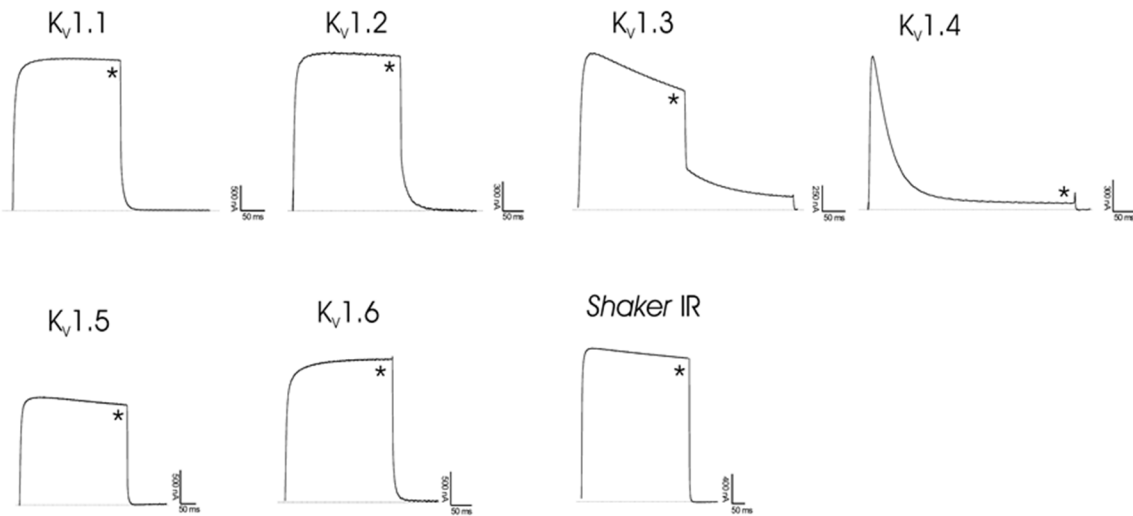

**Supplementary Figure S3 Activity of rHsAFP1 on ion channels expressed in *X. laevis* oocytes.** Traces shown are representative of at least three independent experiments ( $n \geq 3$ ). The dotted line indicates the zero current level. The asterisk (\*) distinguishes the steady-state current after application of 3  $\mu\text{M}$  defensin. Similar results were obtained for application of the defensin up to 10  $\mu\text{M}$ .

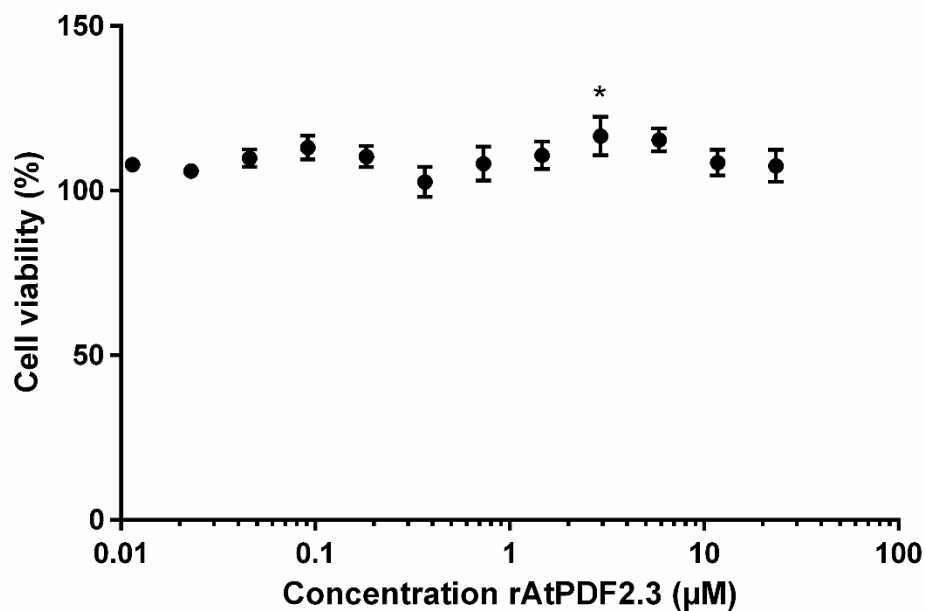

**Supplementary Figure S4 Activity of rAtPDF2.3 on HepG2 cell viability.** HepG2 cells were treated either with water (untreated) or rAtPDF2.3 (0.01  $\mu\text{M}$  – 24.3  $\mu\text{M}$ ) for 24 hours, after which cell viability was determined by XTT staining. Results are expressed relative to the untreated samples. Mean  $\pm$  standard error of at least two experiments in quadruplicate is shown. ANOVA followed by Dunnet post hoc test performed to analyze statistically significant differences between untreated and rAtPDF2.3-treated samples; \* represents  $P = 0.03$ .
